# Supplementary material for: First mtDNA Sequences and Body Measurements for Rattus norvegicus from the Mediterranean Island of Cyprus
Source: PubMed Central journal article supplement (PMC7460190; doi:10.3390/life10080136), 2020-08-05
Supplement: life-10-00136-s001.pdf [file life-10-00136-s001.pdf]

**Table S1.** *Rattus rattus* sequences retrieved from GenBank and included in the phylogenetic analysis.

| Species              | GenBank Accession number |
|----------------------|--------------------------|
|                      | X04735                   |
|                      | GQ891574                 |
|                      | GQ891587                 |
|                      | GQ891571                 |
|                      | KP159555                 |
|                      | KP159542                 |
|                      | KP159541                 |
|                      | KP159533                 |
|                      | KP159525                 |
|                      | KP159551                 |
|                      | KP159545                 |
|                      | KJ603352                 |
|                      | KJ603335                 |
|                      | KJ603326                 |
|                      | KJ603337                 |
|                      | KJ603336                 |
|                      | KJ603317                 |
|                      | KJ603322                 |
|                      | KJ603329                 |
| <i>Rattus rattus</i> | KJ603332                 |
|                      | KP159529                 |
|                      | KP159549                 |
|                      | EU273707                 |
|                      | MH751490                 |
|                      | MH751493                 |
|                      | EF186354                 |
|                      | EF186357                 |
|                      | LN554990                 |
|                      | LN554991                 |
|                      | LN554996                 |
|                      | LN555005                 |
|                      | HQ588111                 |
|                      | FJ897498                 |
|                      | FJ897499                 |
|                      | FJ897500                 |
|                      | FJ897501                 |
|                      | FJ718279                 |
|                      | KR559037                 |
|                      | KR559039                 |
